# Supplementary material for: An ultrasensitive and highly compressive piezoresistive sensor based on a biopolyol-reinforced polyurethane sponge coated with silver nanoparticles and carbon nanotubes/cellulose nanocrystals
Source: Royal Society of Chemistry journal article supplement (doi:10.1039/d0tc04141f), 2020-01-01
Supplement: d0tc04141f1.pdf [file d0tc04141f1.pdf]

**Ultrasensitive and Highly Compressive Piezoresistive Sensor Based on  
Biopolyol-Reinforced Polyurethane Sponge Coated with Silver  
Nanoparticles and Carbon Nanotubes/Cellulose Nanocrystals**

*Qiming Yan Weidi Xie Meng Zhou Heqing Fu\**

School of Chemistry and Chemical Engineering, Guangdong Provincial Key Lab of  
Green Chemical Product Technology, South China University of Technology,  
Guangzhou 510640, P.R. China;

\*Corresponding author; E-mail address: fuhq@scut.edu.cn

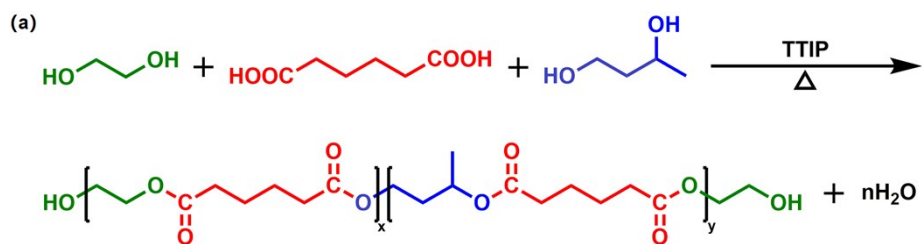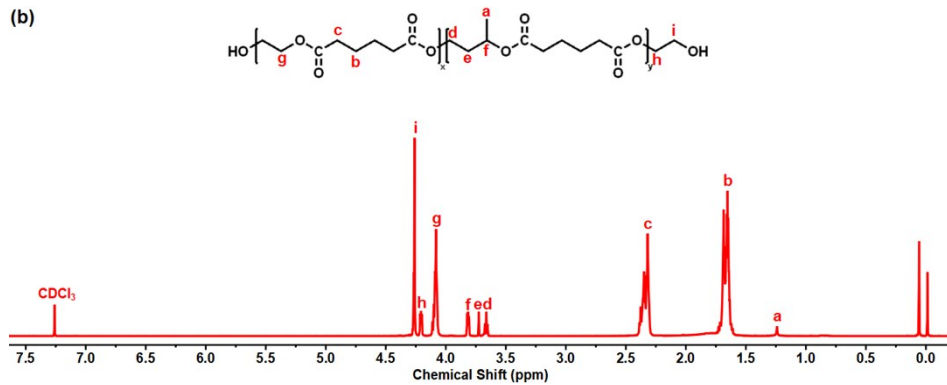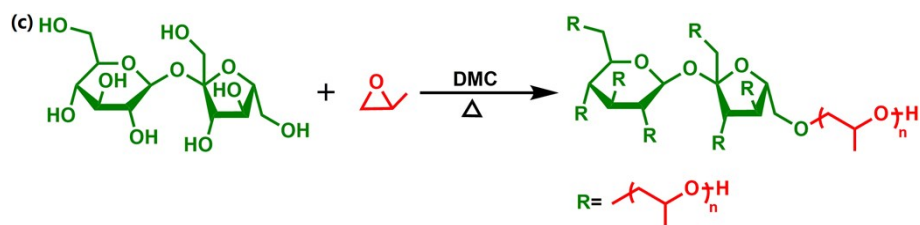

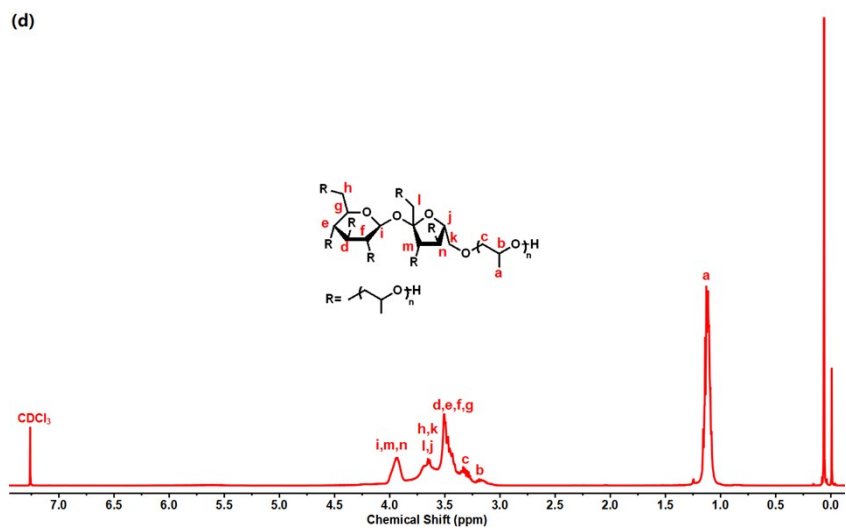

**Figure S1.** (a) Synthesis of bio-based polyester polyol. (b)  $^1\text{H}$  NMR spectrum of bio-based polyester polyol. (c) Synthesis of bio-based polyether polyol. (d)  $^1\text{H}$  NMR spectrum of bio-based polyether polyol.

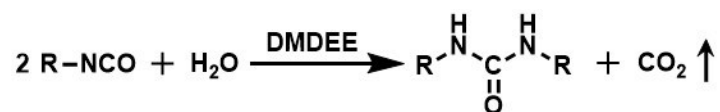

**Figure S2.** The reaction equation for the reaction of isocyanate groups with moisture to form carbon dioxide.

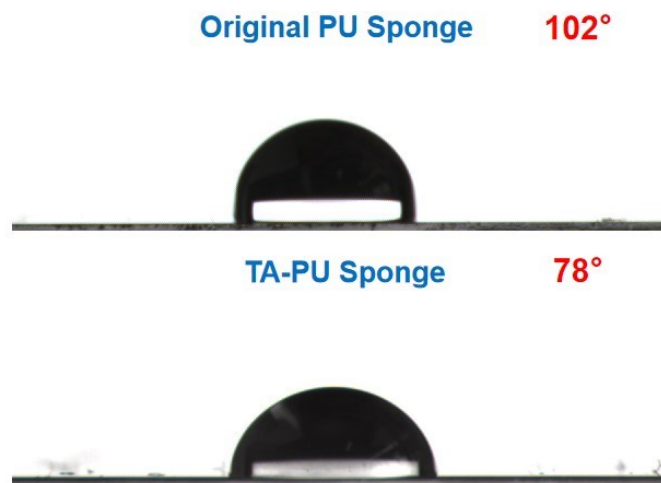

**Figure S3.** Water contact angle of original PU sponge and TA-PU sponge.

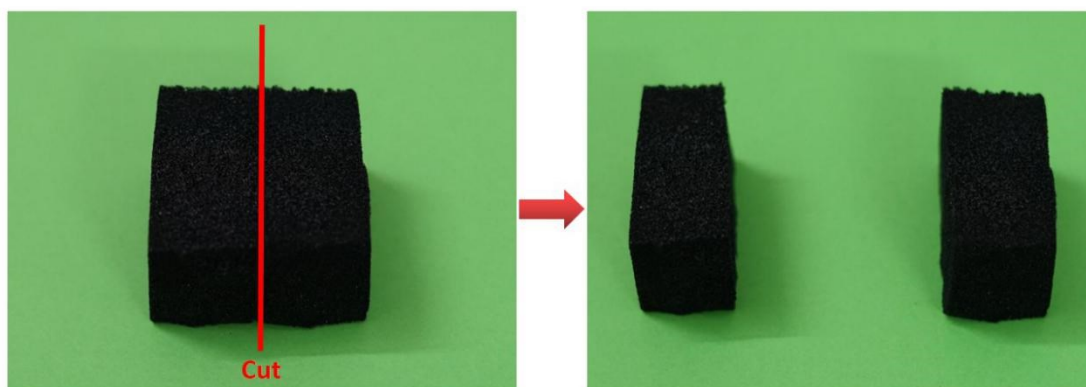

**Figure S4.** Uniform black outer appearance and fractured surfaces of AgNPs/CNTs-CNCs@TA-PU sponge.

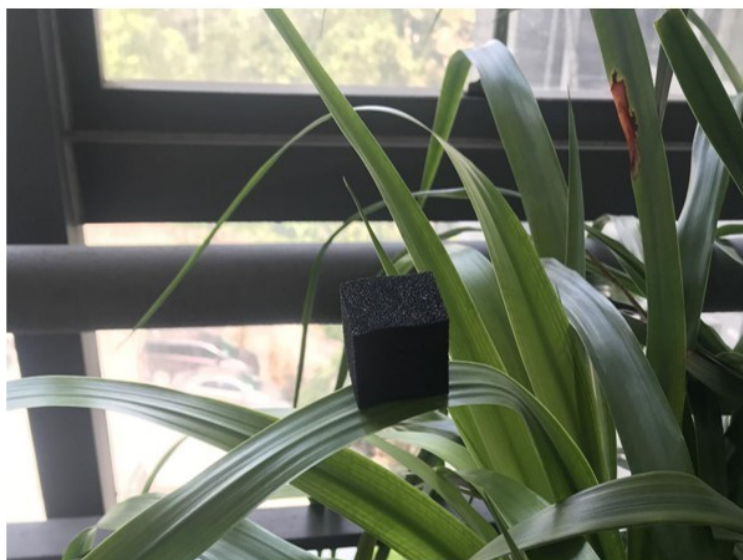

**Figure S5.** Green leaf stably supports the AgNPs/CNTs-CNCs@TA-PU sponge.

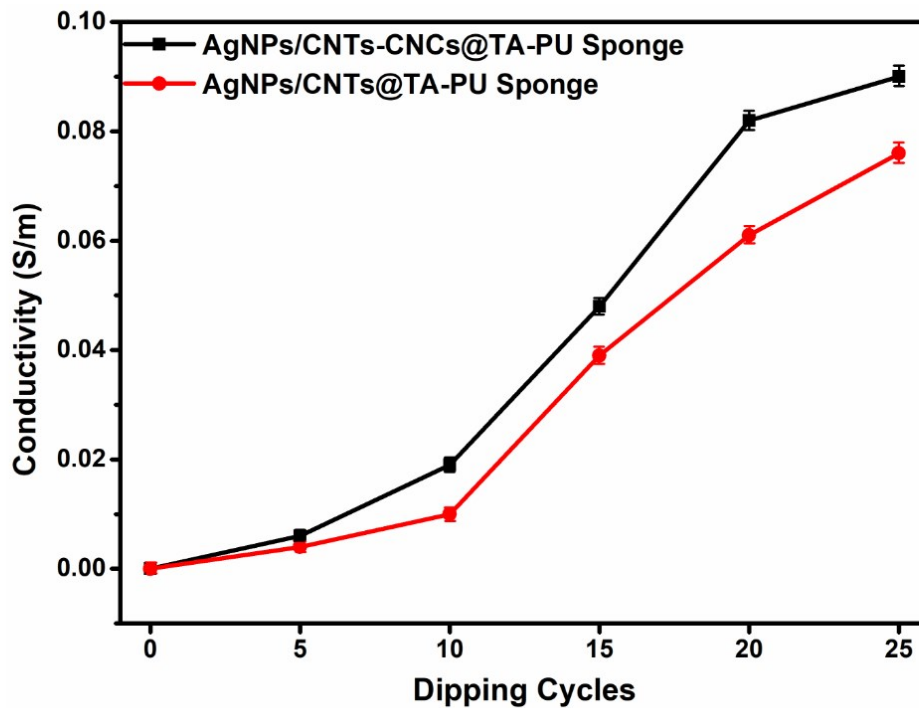

Figure S6. The relationship between the conductivity of the sponge and the dipping number.

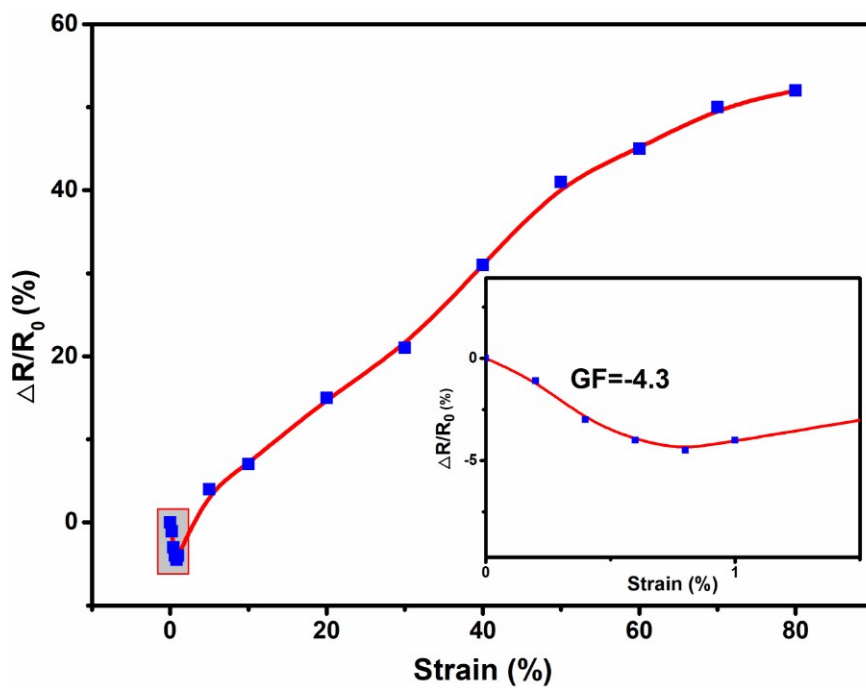

Figure S7.  $\Delta R/R_0$  of the conductive AgNPs/CNTs@TA-PU sponge at different compressive strain.

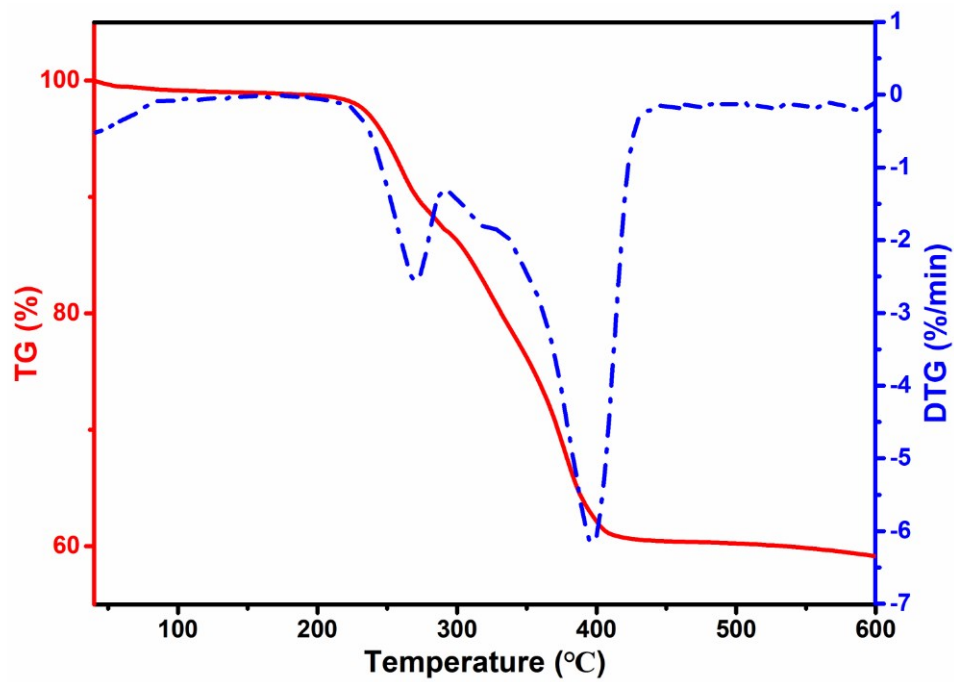

**Figure S8.** TGA and DTG curves of AgNPs/CNTs-CNCs@TA-PU sponge.

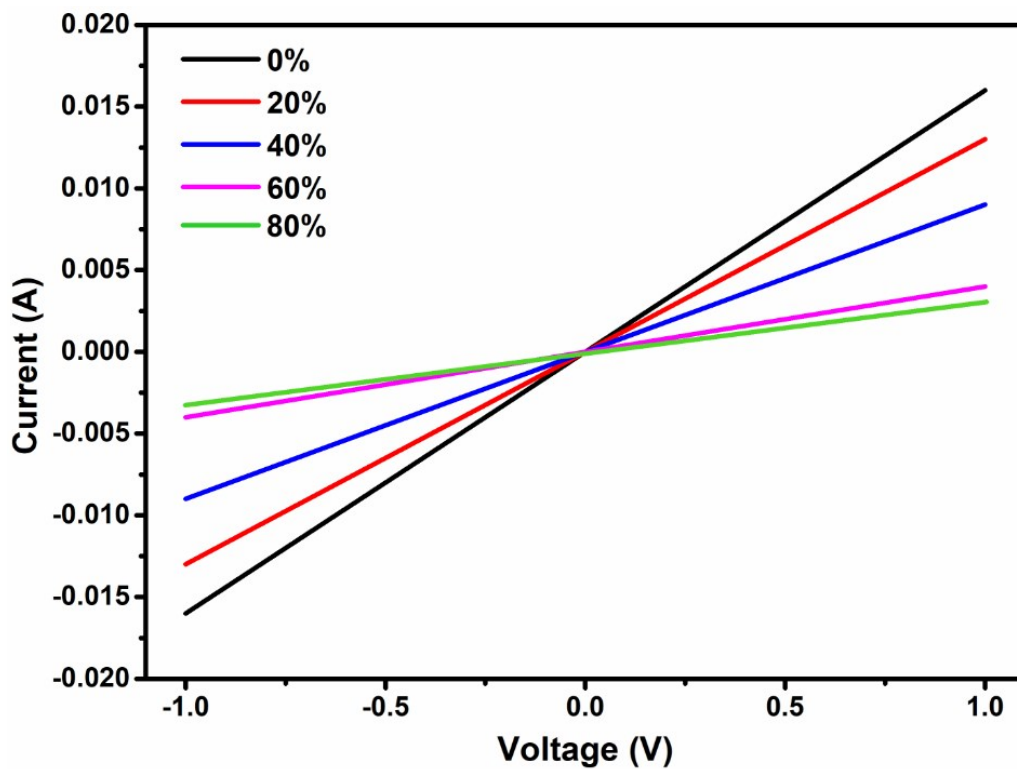

**Figure S9.** Current-voltage characteristic curves of healed conductive sponges under different compressive strain.

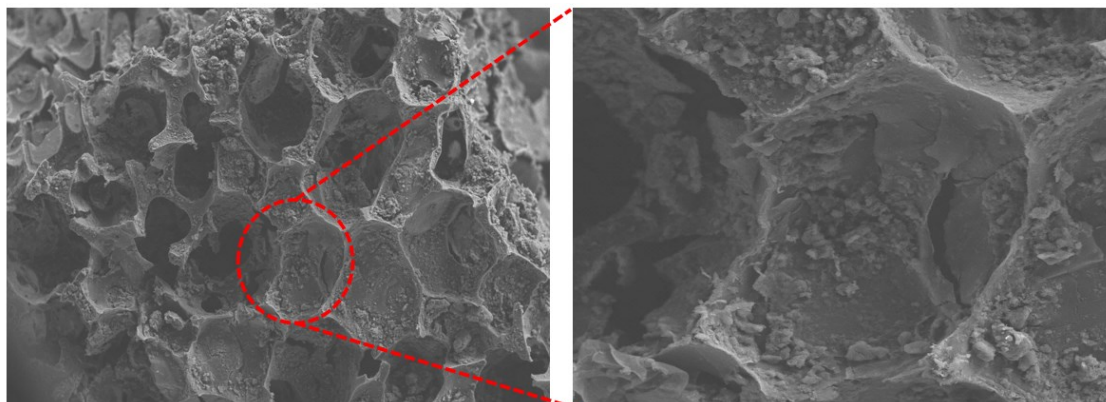



**Figure S10.** SEM images of the healed AgNPs/CNTs-CNCs@TA-PU sponge.
